# Supplementary material for: Solution-Based Ultra-Sensitive Surface-Enhanced Raman Scattering Detection of the Toxin Bacterial Biomarker Pyocyanin in Biological Fluids Using Sharp-Branched Gold Nanostars
Source: PubMed Central journal article supplement (PMC9909734; doi:10.1021/acs.analchem.2c03210), 2023-01-24
Supplement: ac2c03210_si_001.pdf [file ac2c03210_si_001.pdf]

## Supporting Information

### **Solution-based Ultra-Sensitive SERS Detection of the Toxin Bacterial Biomarker Pyocyanin in Biological Fluids Using Sharp-Branched Gold Nanostars**

*Supriya Atta, <sup>a, b</sup> Tuan Vo-Dinh <sup>a, b, c \*</sup>*

<sup>a</sup> Fitzpatrick Institute for Photonics, <sup>b</sup> Department of Biomedical Engineering, <sup>c</sup> Department of Chemistry, Duke University, Durham, NC 27708, USA

(\*) Corresponding Author: [tuan.vodinh@duke.edu](mailto:tuan.vodinh@duke.edu)

### **EXPERIMENTAL SECTION**

#### **Materials and Characterization**

Chloroauric acid (HAuCl<sub>4</sub>), L-ascorbic acid, silver nitrate (AgNO<sub>3</sub>, 99.8%), pyocyanin, MBA, hydrochloric acid (HCl), trisodium citrate (Na<sub>3</sub>C<sub>6</sub>H<sub>5</sub>O<sub>7</sub>), and PVP (40k) were purchased from Sigma-Aldrich. PVP (8k) was purchased from Thermo Fisher Scientific. Pooled human urine and saliva were purchased from Innovative Research. The STEM images of the nanostars were collected from Aberration Corrected STEM-Thermo Fisher Titan 80-300. The UV-vis spectra of

the nanostars were recorded using a Shimadzu UV-3600i spectrometer with cuvettes of 1 cm path length.

### **Synthesis of GNS-1, GNS-2, and GNS-3**

Surfactant-free GNS (GNS-1, GNS-2, and GNS-3) were synthesized by following previously reported method.<sup>1,2</sup> Briefly, 12-15 nm gold nanospheres were synthesized by following a reported procedure.<sup>2</sup> The gold nanospheres were concentrated to 30 times from synthesis concentration and used further for GNS synthesis. For GNS synthesis, 200  $\mu\text{L}$  of 1 N HCl was added to a solution containing 50 mL of 0.5 mM  $\text{HAuCl}_4$  and 15  $\mu\text{L}$  of the gold nanospheres solution. Then, a certain amount of 3 mM  $\text{AgNO}_3$  and 1 mL of 100 mM ascorbic acid were added. To achieve GNS-1, GNS-2, and GNS-3, the final concentration of  $\text{AgNO}_3$  were 15, 30, and 240  $\mu\text{M}$ . The solution was stirred for 2 minutes. Then, 1 mL 1 mM PVP ( $M_w$ -8k) solution was added to GNS solution and stirred for 6 hours at room temperature. The solution was centrifuged at 4000 g for 12 min and dispersed in 12.5 mL of Milli-Q water so that the concentration of GNS was four times higher than the synthesized nanostars. The nanostars were stored at room temperature.

### **Raman Measurements**

The SERS measurement was carried out using a lab built portable system having 785 nm laser source (Rigaku Xantus TM-1 handheld Raman device), a fiber optic probe (InPhotonics RamanProbe), a spectrometer (Princeton Instruments Acton LS 785), and a CCD camera (Princeton Instruments PIXIS: 100BR\_eXcelon). Laser power of the Rigaku Xantus TM-1 was set at 200 mW and the CCD camera exposure time was set at 2 s. The SERS measurement was standardized using ethanol. The SERS measurement involves a minimal sample preparation in which 300  $\mu\text{L}$  of the gold nanoparticle solution (10  $\mu\text{L}$  stock solution of GNS + 287  $\mu\text{L}$  of Milli-Q-water) were thoroughly mixed with 3 $\mu\text{L}$  of analyte solution in a plastic cup cut from a 1.5 mL

centrifuge tube which was covered with aluminum foil to prevent signal interference from the polypropylene well plate.

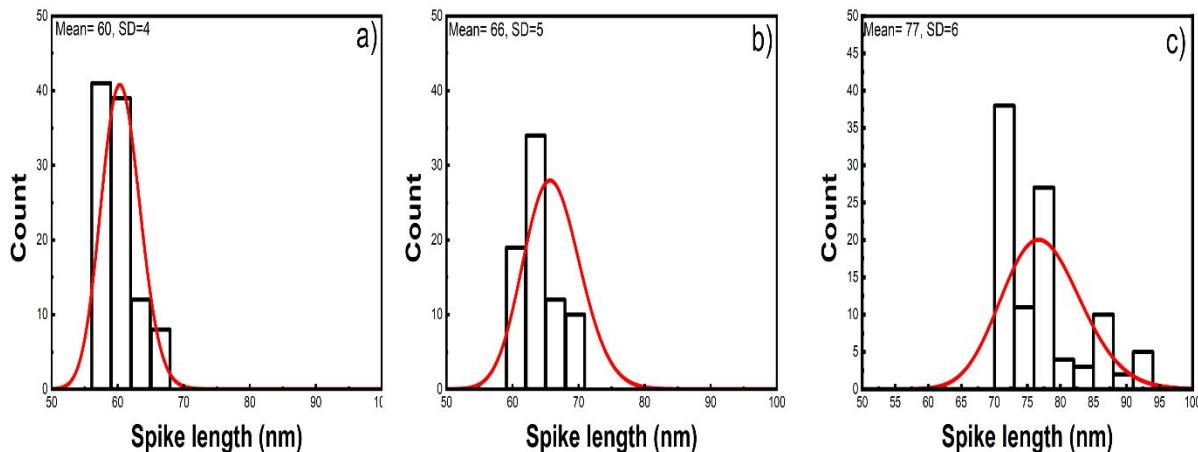

**Figure S1.** Statistical distribution of the spike length of the GNSs (a) GNS-1, (b) GNS-2, (c) GNS-3) where the distance measured from the core to the tip.

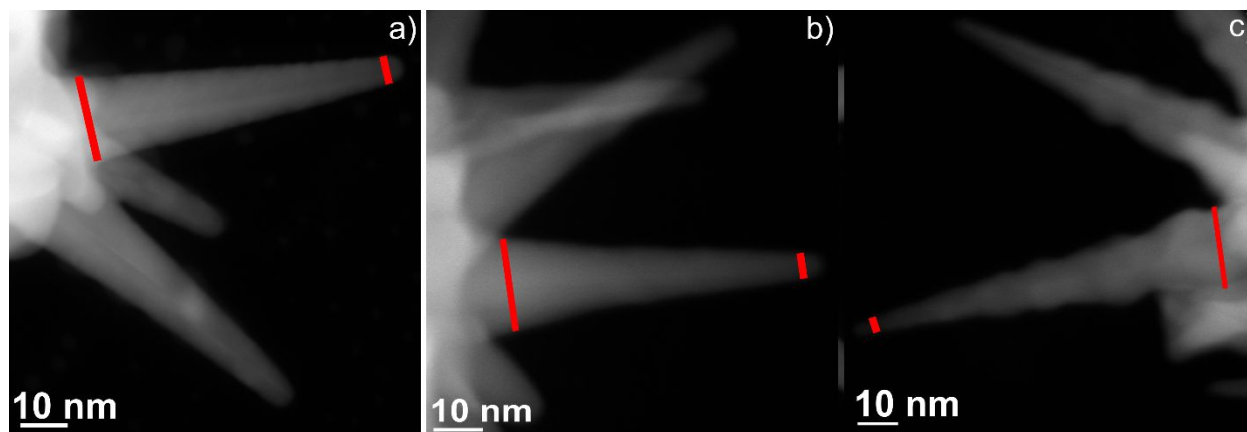

**Figure S2.** The width of the tips for GNS-1 ( $8\pm 2$  nm), GNS-2 ( $6\pm 2$  nm), and GNS-3 ( $3\pm 2$  nm), where the width of the spike at the core is around 18 nm for all these GNSs.

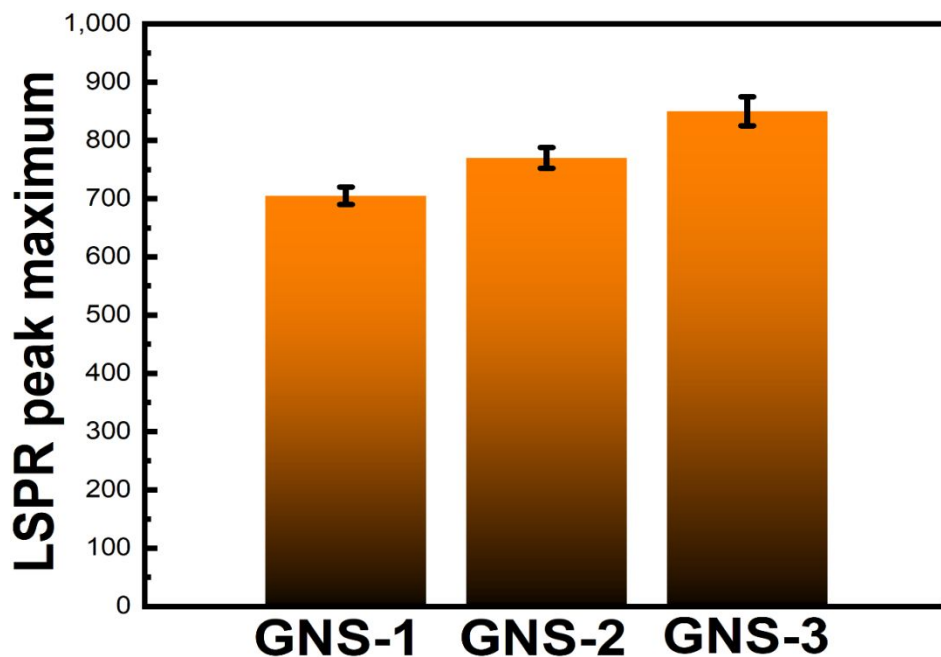

**Figure S3.** Evolution of the LSPR peak maximum of ten different batches of PVP capped GNS-1, GNS-2, and GNS-3.

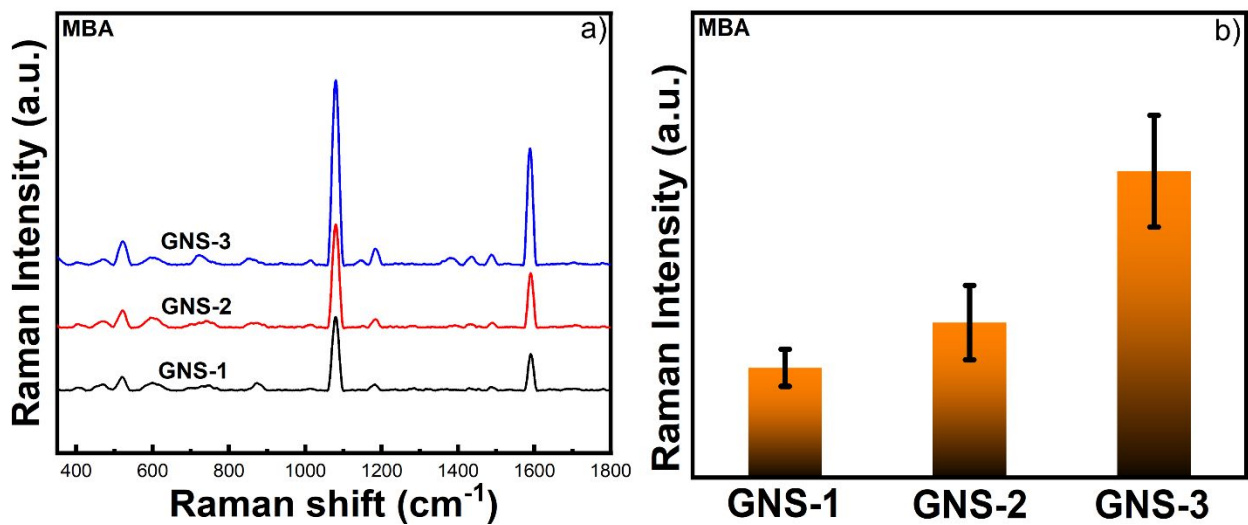

**Figure S4.** SERS spectra (a) and SERS intensity (b) at 1078  $\text{cm}^{-1}$  of MBA with GNS-1, GNS-2, and GNS-3.

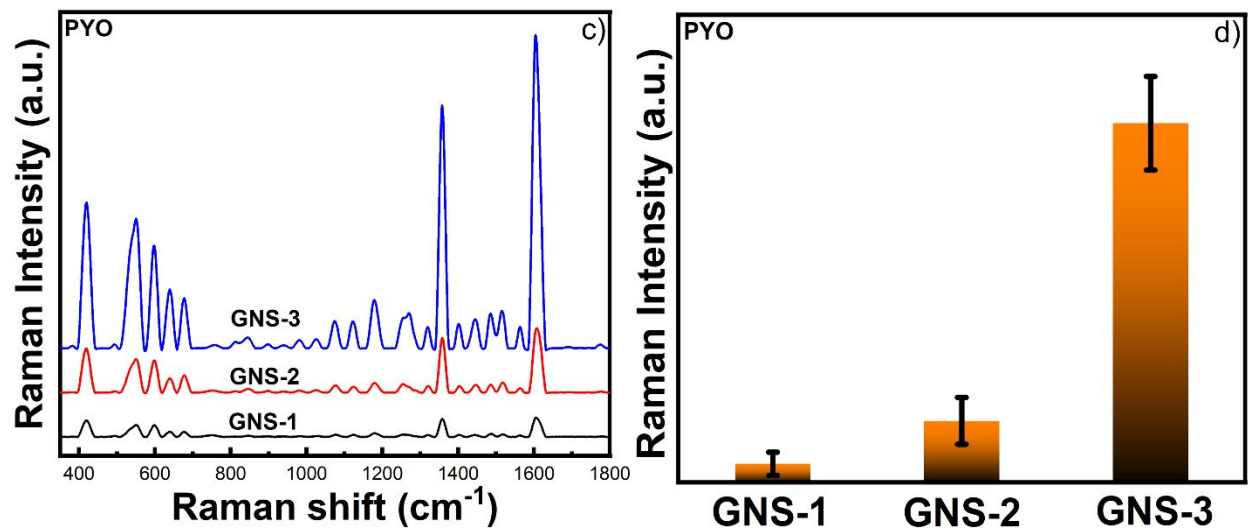

Figure S5. SERS spectra (a) and SERS intensity (b) at  $1602 \text{ cm}^{-1}$  of PYO with GNS-1, GNS-2, and GNS-3.

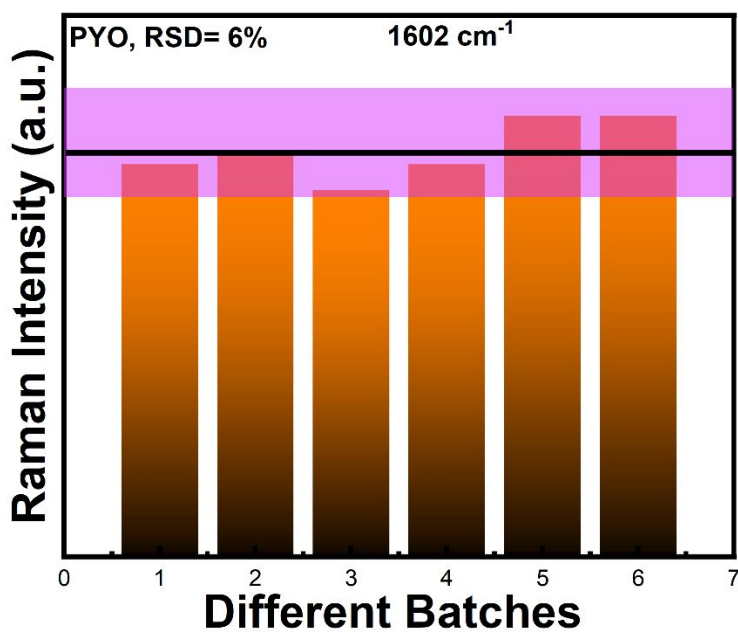

Figure S6. SERS intensity of PYO at  $1602 \text{ cm}^{-1}$  with six different batches of GNS-3.

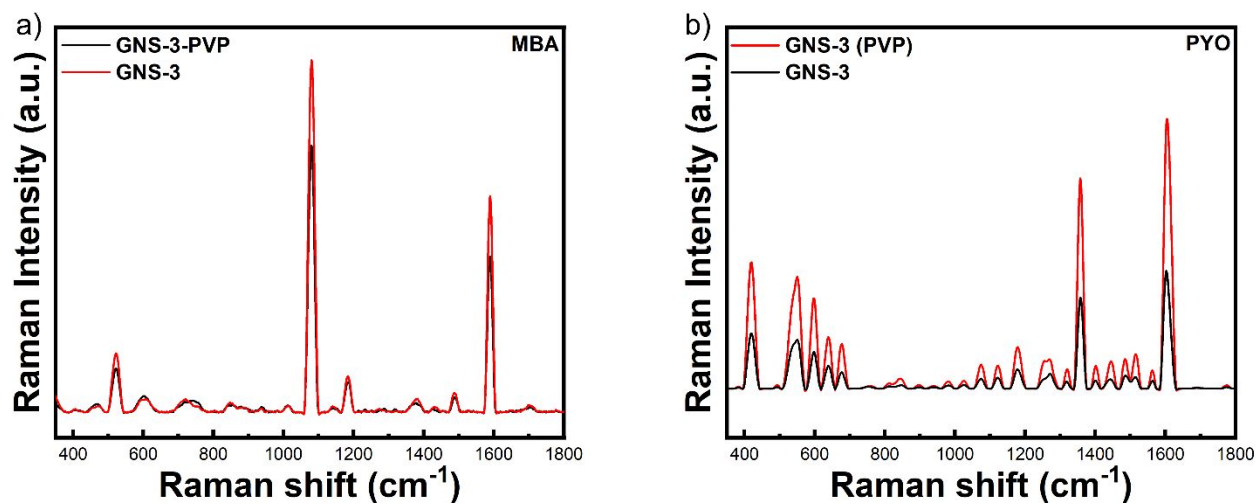

**Figure S7.** SERS spectra of MBA (a) and PYO (b) with PVP capped GNS-3 and surfactant-free GNS-3.

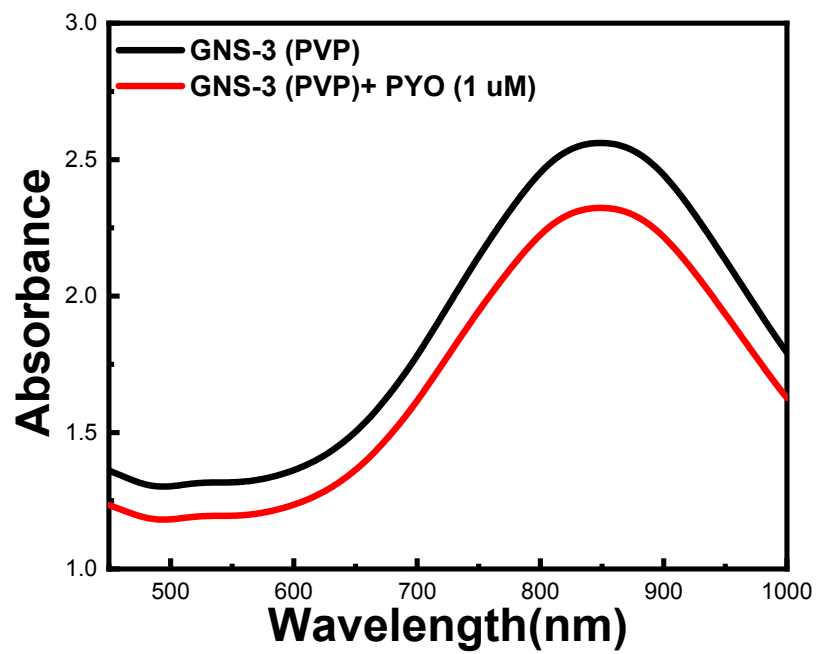

**Figure S8.** Absorbance spectra of PVP capped GNS-3 (black) and after 1uM PYO addition (red).

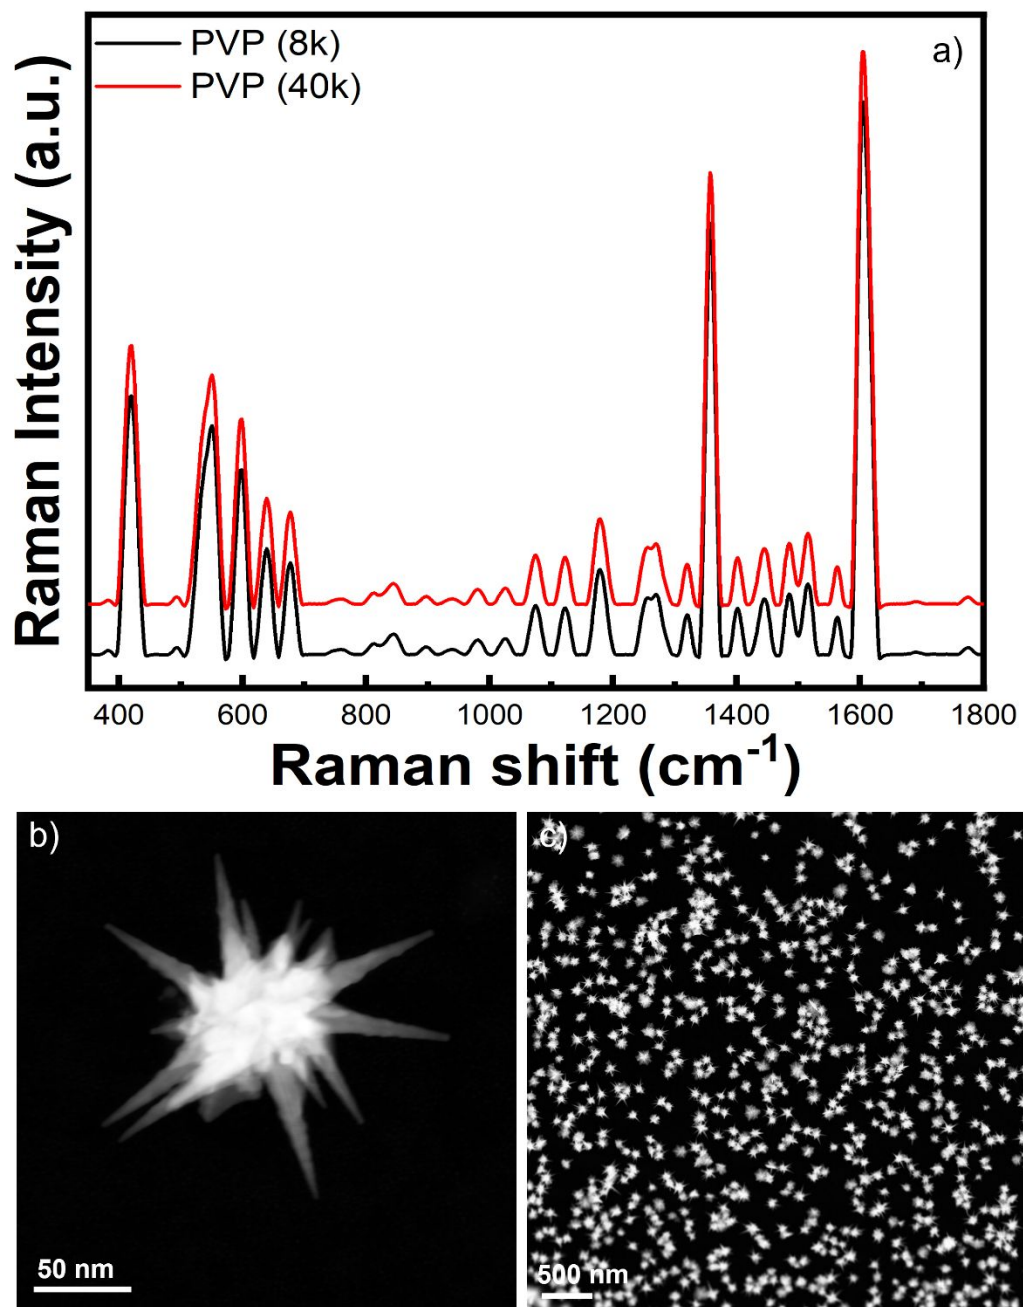

**Figure S9.** SERS spectra of PYO with GNS-3 coated with PVP (Mw-8k) (black) and PVP (Mw-40k) (red) (a). STEM images of PVP (40k) capped GNS-3 (b-c).



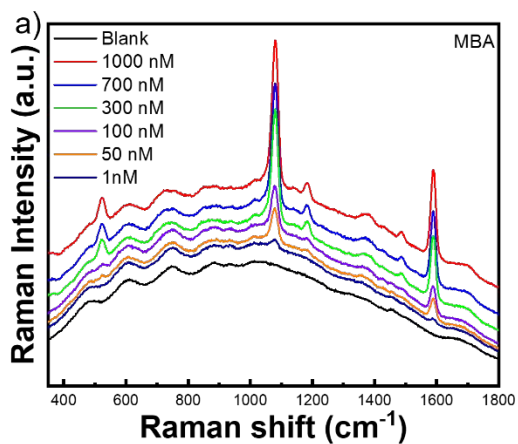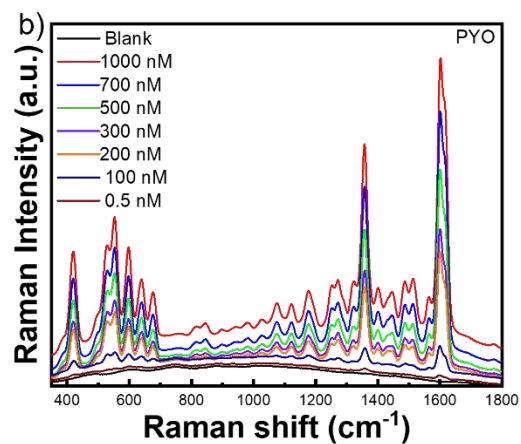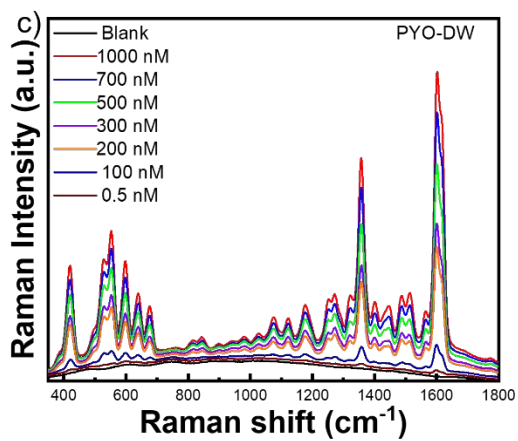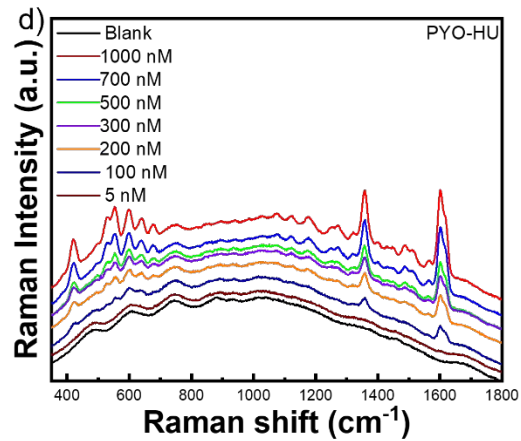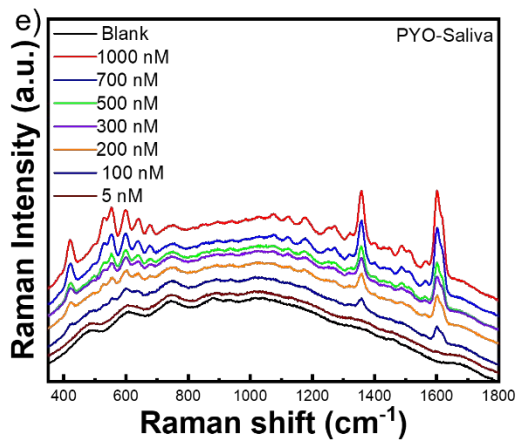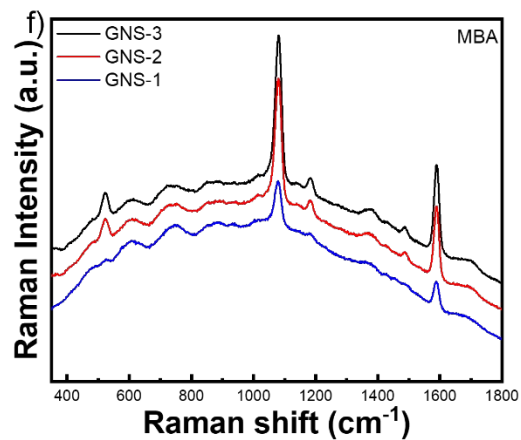

**Figure S10.** SERS spectra without background subtracted for MBA with GNS-3 (a), PYO with GNS-3 (b), PYO (drinking water) with GNS-3 (c), PYO (Human urine) with GNS-3 (d), PYO (saliva) with GNS-3, and MBA with GNS-1, GNS-2, and GNS-3.

## REFERENCE

1. Atta, S.; Watcharawittayakul, T.; Vo-Dinh, T., Ultra-high SERS detection of consumable coloring agents using plasmonic gold nanostars with high aspect-ratio spikes. *Analyst* **2022**, *147* (14), 3340-3349.
2. Atta, S.; Tsoulos, T. V.; Fabris, L., Shaping Gold Nanostar Electric Fields for Surface-Enhanced Raman Spectroscopy Enhancement via Silica Coating and Selective Etching. *The Journal of Physical Chemistry C* **2016**, *120* (37), 20749-20758.
